# Supplementary material for: Fish Reproduction Is Disrupted upon Lifelong Exposure to Environmental PAHs Fractions Revealing Different Modes of Action
Source: PubMed Central journal article supplement (PMC5606653; doi:10.3390/toxics4040026), 2016-10-28
Supplement: toxics-04-00026-s001.pdf [file toxics-04-00026-s001.pdf]

# Supplementary Materials: Fish Reproduction Is Disrupted upon Lifelong Exposure to Environmental PAHs Fractions Revealing Different Modes of Action

Caroline Vignet, Thibaut Larcher, Blandine Davail, Lucette Joassard, Karyn Le Menach, Tiphaine Guionnet, Laura Lyphout, Mireille Ledevin, Manon Goubeau, Hélène Budzinski, Marie-Laure Bégout and Xavier Cousin

**Table S1.** Detailed concentration of individual PAHs in produced diets (ng·g<sup>-1</sup> food; mean ± SD; n = 4–7).

|                                                                | Ring # | PY             |                   |                    |                     | HO             |                  |                   |                    | LO             |                  |                   |                     |
|----------------------------------------------------------------|--------|----------------|-------------------|--------------------|---------------------|----------------|------------------|-------------------|--------------------|----------------|------------------|-------------------|---------------------|
|                                                                |        | Control        | 0.3X              | 1X                 | 3X                  | Control        | 0.3X             | 1X                | 3X                 | Control        | 0.3X             | 1X                | 3X                  |
| naphthalene                                                    | 2      | 6 ± 6          | 15 ± 7            | 56 ± 14            | 157 ± 74            | 4 ± 1          | 37 ± 6           | 120 ± 16          | 405 ± 73           | 3 ± 1          | 161 ± 21         | 315 ± 183         | 1110 ± 472          |
| acenaphthylene                                                 | 2      | 1 ± 0          | 11 ± 2            | 35 ± 6             | 114 ± 23            | 1 ± 0          | 3 ± 1            | 3 ± 1             | 13 ± 13            | 1 ± 0          | 15 ± 1           | 46 ± 2            | 136 ± 19            |
| acenaphthene                                                   | 2      | 2 ± 1          | 14 ± 12           | 29 ± 7             | 89 ± 24             | 27 ± 26        | 46 ± 23          | 74 ± 19           | 190 ± 17           | 23 ± 21        | 37 ± 26          | 67 ± 68           | 90 ± 30             |
| fluorene                                                       | 2      | 2 ± 1          | 14 ± 3            | 42 ± 8             | 137 ± 28            | 2 ± 1          | 34 ± 2           | 99 ± 8            | 312 ± 25           | 2 ± 1          | 79 ± 1           | 232 ± 2           | 677 ± 55            |
| dibenzo[b,d]thiophene                                          | 2      | 2 ± 3          | 11 ± 1            | 34 ± 5             | 102 ± 26            | 0 ± 0          | 54 ± 3           | 166 ± 11          | 546 ± 54           | 0 ± 0          | 443 ± 8          | 1161 ± 18         | 3489 ± 208          |
| phenanthrene                                                   | 3      | 8 ± 4          | 95 ± 21           | 291 ± 60           | 895 ± 213           | 6 ± 3          | 152 ± 7          | 418 ± 32          | 1279 ± 51          | 6 ± 4          | 178 ± 7          | 492 ± 10          | 1438 ± 86           |
| anthracene                                                     | 3      | 1 ± 0          | 49 ± 13           | 159 ± 41           | 482 ± 165           | 0 ± 0          | 22 ± 1           | 70 ± 2            | 220 ± 10           | 0 ± 0          | 2 ± 1            | 4 ± 1             | 42 ± 54             |
| fluoranthene                                                   | 3      | 3 ± 3          | 130 ± 28          | 523 ± 182          | 1782 ± 353          | 2 ± 1          | 17 ± 1           | 44 ± 2            | 145 ± 18           | 2 ± 1          | 2 ± 2            | 1 ± 1             | 15 ± 17             |
| pyrene                                                         | 4      | 3 ± 3          | 112 ± 24          | 447 ± 160          | 1496 ± 311          | 1 ± 0          | 80 ± 3           | 227 ± 19          | 709 ± 64           | 2 ± 0          | 13 ± 2           | 18 ± 2            | 73 ± 28             |
| benzo[a]anthracene                                             | 4      | 1 ± 0          | 171 ± 75          | 581 ± 221          | 1671 ± 763          | 0              | 57 ± 4           | 172 ± 11          | 543 ± 29           | 0              | 4 ± 1            | 14 ± 2            | 49 ± 28             |
| triphenylene + chrysene                                        | 4      | 1 ± 0          | 215 ± 91          | 744 ± 290          | 2144 ± 1032         | ND             | 108 ± 8          | 336 ± 21          | 1073 ± 79          | ND             | 30 ± 1           | 98 ± 4            | 320 ± 62            |
| benzo[b]naphtho[2,1-d]thiophene                                | 4      | 5 ± 3          | 52 ± 26           | 156 ± 70           | 472 ± 230           | 0              | 56 ± 4           | 186 ± 8           | 573 ± 36           | 0              | 66 ± 1           | 194 ± 9           | 588 ± 30            |
| benzo[b]fluoranthene+benzo[k]fluoranthene+benzo[j]fluoranthene | 4      | 2 ± 1          | 273 ± 72          | 868 ± 220          | 2740 ± 674          | 2.4            | 32 ± 2           | 110 ± 8           | 363 ± 18           | 2.4            | 6 ± 0            | 20 ± 1            | 66 ± 7              |
| benzo[e]pyrene                                                 | 5      | 1 ± 0          | 109 ± 29          | 346 ± 86           | 1084 ± 286          | ND             | 56 ± 3           | 173 ± 11          | 536 ± 26           | ND             | 17 ± 0           | 52 ± 1            | 160 ± 10            |
| benzo[a]pyrene                                                 | 5      | 1 ± 0          | 118 ± 33          | 373 ± 95           | 1168 ± 346          | 0 ± 0          | ND               | 108 ± 6           | 342 ± 10           | 0 ± 0          | ND               | 4 ± 1             | 17 ± 3              |
| perylene                                                       | 5      | 1 ± 0          | 37 ± 9            | 121 ± 27           | 390 ± 83            | 0 ± 0          | ND               | 56 ± 4            | 172 ± 14           | 0 ± 0          | ND               | 5 ± 1             | 13 ± 1              |
| indeno(1,2,3-cd)pyrene                                         | 5      | 0 ± 0          | 123 ± 41          | 349 ± 89           | 1188 ± 265          | ND             | ND               | ND                | ND                 | ND             | ND               | ND                | ND                  |
| dibenz(ah)anthracene + dibenz(ac)anthracene                    | 5      | 2 ± 2          | 32 ± 11           | 108 ± 43           | 301 ± 106           | 0.3            | ND               | 34 ± 2            | 113 ± 6            | 0.3            | ND               | 3 ± 1             | 11 ± 1              |
| benzo[ghi]perylene                                             | 6      | 0 ± 0          | 87 ± 27           | 268 ± 67           | 893 ± 191           | 0 ± 0          | ND               | 146 ± 10          | 481 ± 12           | 0 ± 0          | ND               | 12 ± 0            | 42 ± 12             |
| <b>Sum PAHs</b>                                                |        | <b>34 ± 6</b>  | <b>1670 ± 448</b> | <b>5532 ± 1383</b> | <b>17305 ± 4798</b> | <b>39 ± 30</b> | <b>880 ± 28</b>  | <b>2558 ± 169</b> | <b>8082 ± 305</b>  | <b>33 ± 26</b> | <b>1053 ± 63</b> | <b>2739 ± 231</b> | <b>8335 ± 854</b>   |
| 2-methylnaphthalene                                            | 2      | 8 ± 9          | 15 ± 3            | 43 ± 8             | 116 ± 39            | 4 ± 1          | 137 ± 13         | 396 ± 32          | 1259 ± 118         | 4 ± 1          | 420 ± 19         | 1036 ± 96         | 2982 ± 725          |
| 1-methylnaphthalene                                            | 2      | 4 ± 6          | 8 ± 2             | 22 ± 5             | 62 ± 21             | 2 ± 0          | 86 ± 8           | 261 ± 20          | 854 ± 84           | 2 ± 0          | 458 ± 19         | 1147 ± 102        | 3300 ± 739          |
| <b>Sum methylnaphthalenes</b>                                  |        | <b>12 ± 15</b> | <b>23 ± 5</b>     | <b>65 ± 13</b>     | <b>178 ± 60</b>     | <b>6 ± 2</b>   | <b>223 ± 20</b>  | <b>657 ± 52</b>   | <b>2113 ± 201</b>  | <b>5 ± 1</b>   | <b>878 ± 38</b>  | <b>2183 ± 197</b> | <b>6282 ± 1465</b>  |
| 3-methylphenanthrene                                           | 3      | 2 ± 1          | 17 ± 3            | 47 ± 11            | 149 ± 31            | 1 ± 0          | 126 ± 24         | 326 ± 47          | 934 ± 160          | 1 ± 0          | 114 ± 14         | 319 ± 38          | 850 ± 156           |
| 2-methylphenanthrene                                           | 3      | 2 ± 0          | 19 ± 5            | 60 ± 13            | 175 ± 41            | 1 ± 0          | 149 ± 11         | 400 ± 28          | 1172 ± 166         | 1 ± 0          | 121 ± 2          | 340 ± 16          | 915 ± 124           |
| 2-methylanthracene                                             | 3      | 0 ± 0          | 8 ± 2             | 25 ± 6             | 78 ± 18             | ND             | ND               | ND                | 409 ± 32           | ND             | ND               | ND                | 32 ± 8              |
| 9-methylphenanthrene + 1-methylanthracene                      | 3      | 1 ± 0          | 14 ± 4            | 49 ± 12            | 165 ± 56            | 1 ± 0          | 137 ± 20         | 360 ± 85          | 990 ± 206          | 1 ± 0          | 283 ± 29         | 798 ± 42          | 2226 ± 394          |
| 1-methylphenanthrene                                           | 3      | 1 ± 0          | 12 ± 3            | 37 ± 11            | 100 ± 28            | 0 ± 0          | 73 ± 8           | 227 ± 15          | 617 ± 71           | 1 ± 0          | 122 ± 4          | 348 ± 14          | 956 ± 97            |
| <b>Sum methylphenanthrenes</b>                                 |        | <b>7 ± 3</b>   | <b>70 ± 15</b>    | <b>218 ± 41</b>    | <b>668 ± 157</b>    | <b>2 ± 2</b>   | <b>530 ± 34</b>  | <b>1448 ± 144</b> | <b>4122 ± 581</b>  | <b>2 ± 2</b>   | <b>640 ± 35</b>  | <b>1804 ± 67</b>  | <b>4957 ± 731</b>   |
| <b>Total PAHs</b>                                              |        | <b>55 ± 12</b> | <b>1763 ± 468</b> | <b>5816 ± 1433</b> | <b>18151 ± 4983</b> | <b>47 ± 33</b> | <b>1633 ± 71</b> | <b>4663 ± 360</b> | <b>14317 ± 813</b> | <b>40 ± 29</b> | <b>2572 ± 96</b> | <b>6726 ± 278</b> | <b>19574 ± 1945</b> |

Ring #: number of aromatic rings; ND: not detectable.
